# Supplementary material
Source: Springer Nature journal article supplement (https://www.springermedizin.de/resource/supplementary/12936_2012_2609_MOESM11_ESM.pdf/9543310)

A

**AMA-1-3D7**

R = 0.99

p < 0.0001

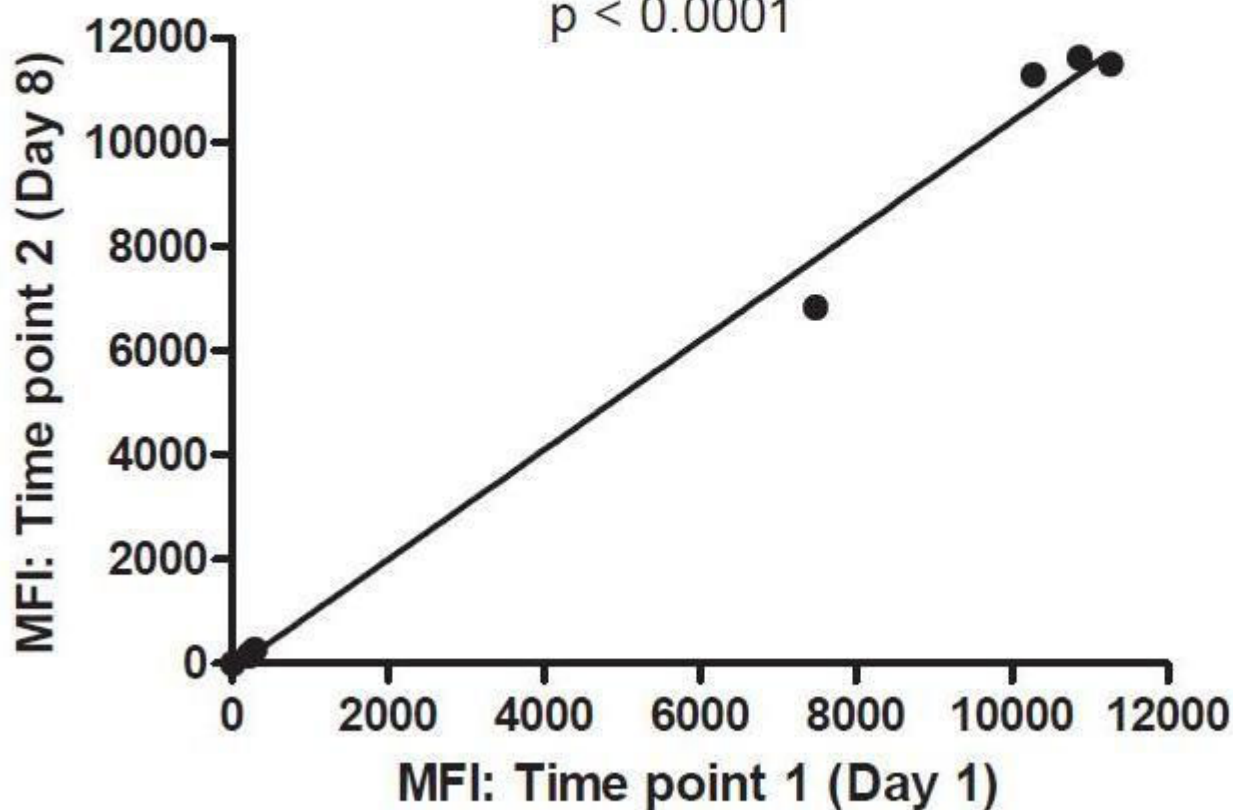

B

**GLURP-R0**

R = 0.99

p < 0.0001

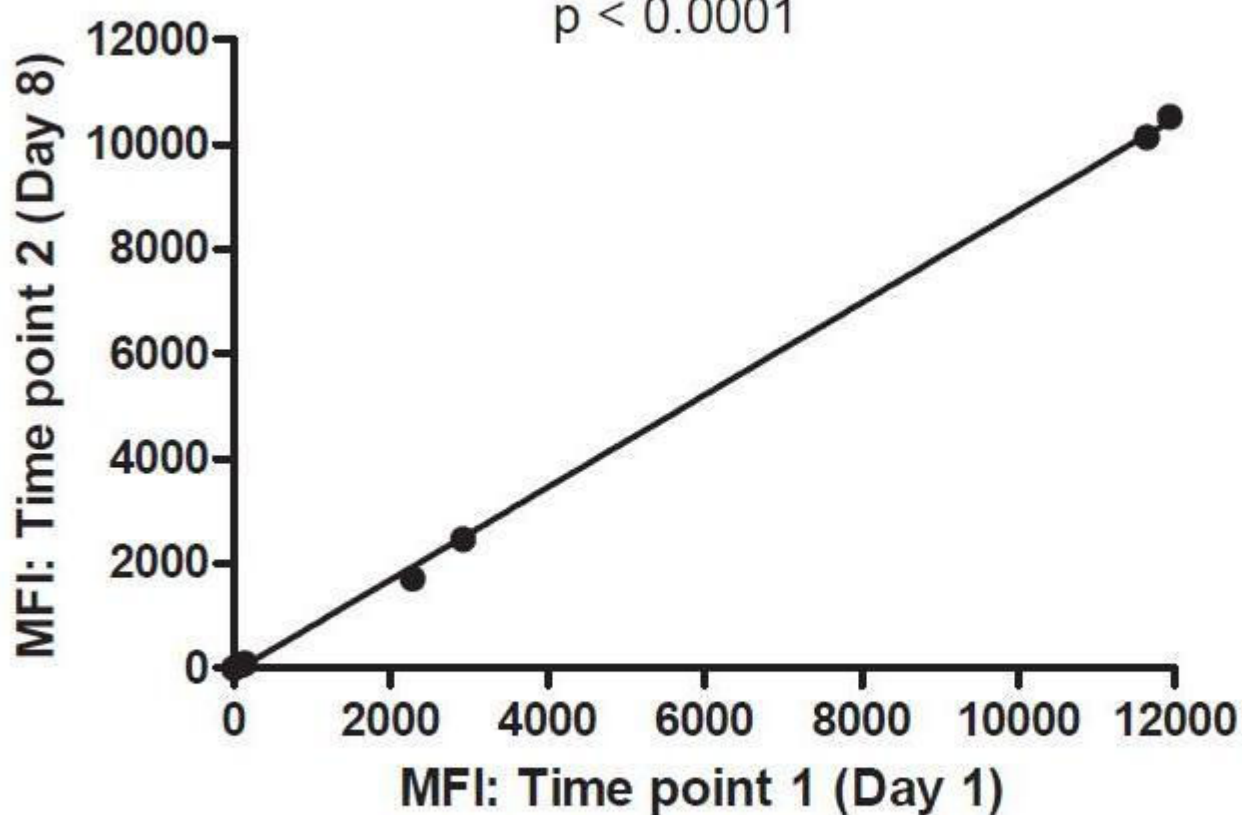

Supplement: MOESM11 [file 9543310]
